# Supplementary material for: 3D crustal structure of the Ligurian Basin revealed by surface wave tomography using ocean bottom seismometer data
Source: Copernicus journal article supplement (doi:10.5194/se-12-2597-2021), 2021-11-19
Supplement: Supplementary file [file se-12-2597-2021-supplement-title-page.pdf › se-12-2597-2021-supplement-title-page.pdf]

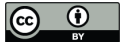

## *Supplement of*

# **3D crustal structure of the Ligurian Basin revealed by surface wave tomography using ocean bottom seismometer data**

**Felix N. Wolf et al.**

*Correspondence to:* Felix N. Wolf (fnwolf@geomar.de)

- se-12-2597-2021-supplement-title-page.pdf
- SE-wolfetal-2021-supplement
  - Readme.txt
  - Vs-maps-xyzfiles
    - \* bound-18kmgrid.gmt
    - \* layer1-vs.xyz
    - \* layer10-vs.xyz
    - \* layer11-vs.xyz
    - \* layer2-vs.xyz
    - \* layer3-vs.xyz
    - \* layer4-vs.xyz
    - \* layer5-vs.xyz
    - \* layer6-vs.xyz
    - \* layer7-vs.xyz
    - \* layer8-vs.xyz
    - \* layer9-vs.xyz
    - \* plot-vs
    - \* rmserr.xyz
  - Wolf-etal-2021-LigurianSea-supplement.pdf
  - code-groupvelgrid-to-1Dinput
    - \* 1-grd2xyz.tcsh
    - \* 2-extract-1D-v-profiles.tcsh
    - \* 3-prepare-dispfiles.tcsh
    - \* 4-run-1Dtomo.tcsh
    - \* 5a-create-output-xyz.tcsh
    - \* 5b-create-rmsoutput.tcsh
    - \* topo.grd

- groupvel-input-lagtimes
  - \* lagtimes-period10.txt
  - \* lagtimes-period12.txt
  - \* lagtimes-period15.txt
  - \* lagtimes-period20.txt
  - \* lagtimes-period30.txt
  - \* lagtimes-period40.txt
  - \* lagtimes-period5.txt
  - \* lagtimes-period50.txt
  - \* lagtimes-period6.txt
  - \* lagtimes-period60.txt
  - \* lagtimes-period7.txt
  - \* lagtimes-period70.txt
  - \* lagtimes-period8.txt
  - \* lagtimes-period80.txt
  - \* lagtimes-period9.txt
  - \* lagtimes-period90.txt
- groupvelmaps-gridfiles
  - \* grid-final-per10.grd
  - \* grid-final-per12.grd
  - \* grid-final-per15.grd
  - \* grid-final-per20.grd
  - \* grid-final-per30.grd
  - \* grid-final-per40.grd
  - \* grid-final-per5.grd
  - \* grid-final-per50.grd
  - \* grid-final-per6.grd
  - \* grid-final-per60.grd
  - \* grid-final-per7.grd
  - \* grid-final-per70.grd
  - \* grid-final-per8.grd
  - \* grid-final-per80.grd
  - \* grid-final-per9.grd
  - \* grid-final-per90.grd
  - \* residuals-per10.dat
  - \* residuals-per12.dat
  - \* residuals-per15.dat
  - \* residuals-per20.dat
  - \* residuals-per30.dat
  - \* residuals-per40.dat
  - \* residuals-per5.dat
  - \* residuals-per50.dat
  - \* residuals-per6.dat
  - \* residuals-per60.dat
  - \* residuals-per7.dat
  - \* residuals-per70.dat
  - \* residuals-per8.dat

- \* residuals-per80.dat
- \* residuals-per9.dat
- \* residuals-per90.dat

The copyright of individual parts of the supplement might differ from the article licence.
